# Supplementary material
Source: PubMed Central journal article supplement (PMC3250548)
Supplement: 11606_2011_1837_MOESM1_ESM.pdf [file 11606_2011_1837_MOESM1_ESM.pdf]

## Appendices

Appendix Table 1: CRC screening test attributes and levels

| Attribute                                            | Levels                                                                                                                                                                      |
|------------------------------------------------------|-----------------------------------------------------------------------------------------------------------------------------------------------------------------------------|
| Ability to reduce colorectal incidence and mortality | 40%, 60%, 80%                                                                                                                                                               |
| Discomfort                                           | Mild, Moderate                                                                                                                                                              |
| Nature of test                                       | -No prep time, home test, no recovery time<br>-1/2 day prep time, test in medical facility, 1 hour recovery<br>-1 day prep time, test in medical facility, 24 hour recovery |
| Frequency                                            | Every year, Every 5 years, Every 10 years                                                                                                                                   |
| Risk of major complications over 10 years            | 1 in 10,000<br>10 in 10,000<br>50 in 10,000                                                                                                                                 |
| Out of pocket costs over 10 years                    | \$100<br>\$250<br>\$500                                                                                                                                                     |

Appendix 2: Example of a conjoint analysis task

Which option do you prefer?

| Feature                          | Option 1                                                                                                                                | OR | Option 2                                                                                                                                 |
|----------------------------------|-----------------------------------------------------------------------------------------------------------------------------------------|----|------------------------------------------------------------------------------------------------------------------------------------------|
| Reduces colon cancer risk by     | 80%                                                                                                                                     |    | 60%                                                                                                                                      |
| Discomfort of test               | Medium                                                                                                                                  |    | Low                                                                                                                                      |
| Nature of test                   | <ul style="list-style-type: none"> <li>- Half-day preparation</li> <li>- Test in medical facility</li> <li>- 1 hour recovery</li> </ul> |    | <ul style="list-style-type: none"> <li>- Full day preparation</li> <li>- Test in medical facility</li> <li>- 24 hour recovery</li> </ul> |
| Frequency of test                | Each year                                                                                                                               |    | Every 10 years                                                                                                                           |
| Risk of complications            | 50 in 10,000                                                                                                                            |    | 10 in 10,000                                                                                                                             |
| Out of pocket cost over 10 years | \$500                                                                                                                                   |    | \$250                                                                                                                                    |

Prefer  
Option 1

No  
Preference

Prefer  
Option 2

### Appendix 3: Information provided to participants

- In this research study, we will be talking about colon cancer screening. The colon is the large intestine or bowel. Colon cancer can affect both men and women, and becomes more common after age 50.
- It is recommended that adults ages 50-75 have some form of screening for colon cancer. Screening means checking for the condition before it causes any symptoms. There are several ways to be screened, and no one way is clearly best for everyone.
- Your answers to the questions in this packet will help us learn more about the information men and women need to make decisions about how to be screened for colon cancer.
- While answering questions in this packet, please imagine that your doctor would like you to make a decision about colon cancer screening.
- The lifetime chance of getting colon cancer is about 6 out of 100. The lifetime chance of dying from colon cancer is about 3 out of 100.
- Testing for colon cancer beginning at age 50 reduces the chance of developing colon cancer or dying from it.

- There are several effective ways to be tested for colon cancer.
- If your test for colon cancer shows a problem, you will need to have other tests or treatments.
- The best test for you depends on how you feel about different features of the tests themselves.

We are going to ask you about 6 different features of colon cancer screening tests. Please answer the questions to the best of your ability. There are no right or wrong answers. We just want to know what you think. When you are finished, please go on to the Post Exercise Survey.

- Ability to reduce the chance of developing and dying from colon cancer- This is the percent reduction in the chance of developing and dying from colon cancer over the next 10 years. For example, a 40% reduction in risk would mean that your chances of developing or dying from colon cancer in the next 10 years would go from 20 in 1,000 to 12 in 1,000.
- Discomfort - The amount of physical or emotional discomfort, including pain, that comes from preparing for, having, or recovering from the test.

- Nature of the test - Where the test is done (at home or in a special medical facility) and how long it takes to prepare for, do, and recover from the test.

- Frequency - How often the test needs to be done to be effective.

- Risk of major complications over 10 years - The chance of a problem requiring hospitalization from the test itself or from a required follow-up test over 10 years. Most commonly, these complications are bleeding or when the test causes a hole in your colon.

- Out of pocket costs over 10 years- The amount of money OVER 10 YEARS that you would have to pay and that would not be covered by your insurance.

#### Appendix 4: Importance scores for participants in conjoint analysis arm\*

| Ability to reduce CRC incidence and mortality | Discomfort associated with screening | Nature of the screening test | Frequency of the screening test | Complications associated with screening | Out of pocket costs |
|-----------------------------------------------|--------------------------------------|------------------------------|---------------------------------|-----------------------------------------|---------------------|
| 68.0                                          | 1.2                                  | 9.8                          | 1.8                             | 5.9                                     | 13.3                |
| 67.5                                          | 1.8                                  | 10.2                         | 2.2                             | 5.5                                     | 12.8                |
| 67.1                                          | 1.7                                  | 11.4                         | 2.1                             | 5.1                                     | 12.6                |
| 67.1                                          | 0.8                                  | 11.7                         | 1.3                             | 5.8                                     | 13.3                |
| 66.8                                          | 1.6                                  | 10.5                         | 1.9                             | 4.7                                     | 14.5                |
| 66.6                                          | 1.3                                  | 11.5                         | 2.0                             | 5.5                                     | 13.2                |
| 66.0                                          | 1.1                                  | 10.7                         | 3.2                             | 5.2                                     | 13.9                |
| 65.8                                          | 2.7                                  | 12.1                         | 0.5                             | 5.2                                     | 13.7                |
| 65.8                                          | 1.5                                  | 11.2                         | 2.1                             | 5.5                                     | 13.9                |
| 58.1                                          | 1.6                                  | 17.0                         | 6.2                             | 5.0                                     | 12.2                |
| 55.3                                          | 2.6                                  | 4.3                          | 13.4                            | 10.9                                    | 13.6                |
| 50.2                                          | 2.8                                  | 3.5                          | 9.3                             | 15.7                                    | 18.4                |
| 49.4                                          | 3.5                                  | 2.3                          | 10.7                            | 16.2                                    | 17.8                |
| 45.2                                          | 2.4                                  | 13.2                         | 24.6                            | 8.5                                     | 6.2                 |
| 41.8                                          | 0.4                                  | 11.9                         | 22.7                            | 19.4                                    | 3.9                 |
| 41.7                                          | 2.7                                  | 11.1                         | 22.0                            | 13.7                                    | 8.8                 |
| 41.6                                          | 8.4                                  | 11.3                         | 11.7                            | 6.1                                     | 21.0                |
| 40.8                                          | 0.5                                  | 14.5                         | 21.9                            | 11.8                                    | 10.5                |
| 38.4                                          | 7.9                                  | 26.2                         | 8.4                             | 7.6                                     | 11.6                |
| 37.6                                          | 2.5                                  | 17.8                         | 18.7                            | 15.8                                    | 7.6                 |
| 37.2                                          | 3.4                                  | 18.6                         | 9.3                             | 16.1                                    | 15.4                |
| 35.7                                          | 5.3                                  | 24.8                         | 23.8                            | 4.5                                     | 5.8                 |
| 35.6                                          | 4.3                                  | 12.9                         | 22.0                            | 11.0                                    | 14.2                |
| 34.0                                          | 3.1                                  | 26.0                         | 19.1                            | 9.2                                     | 8.6                 |
| 33.4                                          | 1.8                                  | 18.0                         | 21.0                            | 10.4                                    | 15.4                |
| 31.3                                          | 5.0                                  | 6.3                          | 36.1                            | 18.1                                    | 3.1                 |
| 30.8                                          | 2.1                                  | 26.4                         | 21.6                            | 10.7                                    | 8.4                 |
| 29.7                                          | 0.1                                  | 20.6                         | 30.0                            | 10.5                                    | 9.1                 |
| 29.5                                          | 1.3                                  | 13.1                         | 21.9                            | 10.2                                    | 24.1                |
| 28.5                                          | 6.1                                  | 8.6                          | 34.0                            | 17.4                                    | 5.5                 |
| 28.2                                          | 1.8                                  | 20.5                         | 30.2                            | 9.9                                     | 9.5                 |
| 28.1                                          | 3.5                                  | 17.3                         | 35.6                            | 7.5                                     | 8.1                 |
| 27.9                                          | 10.2                                 | 46.5                         | 1.4                             | 2.3                                     | 11.6                |
| 21.6                                          | 0.5                                  | 21.6                         | 18.3                            | 20.9                                    | 17.1                |
| 20.7                                          | 7.6                                  | 50.2                         | 12.7                            | 6.5                                     | 2.3                 |
| 20.3                                          | 5.8                                  | 27.3                         | 14.7                            | 14.7                                    | 17.3                |
| 18.6                                          | 14.5                                 | 37.8                         | 10.0                            | 6.6                                     | 12.6                |
| 18.4                                          | 1.8                                  | 9.3                          | 29.7                            | 30.0                                    | 10.9                |
| 17.9                                          | 0.4                                  | 23.2                         | 22.5                            | 21.8                                    | 14.3                |
| 17.6                                          | 0.9                                  | 22.6                         | 25.3                            | 21.2                                    | 12.3                |
| 16.6                                          | 4.5                                  | 26.9                         | 32.1                            | 14.6                                    | 5.3                 |
| 16.2                                          | 7.4                                  | 24.3                         | 34.0                            | 14.2                                    | 3.9                 |

|      |      |      |      |      |      |
|------|------|------|------|------|------|
| 15.6 | 1.4  | 23.7 | 28.5 | 19.8 | 11.0 |
| 15.3 | 3.8  | 62.9 | 5.6  | 5.1  | 7.4  |
| 14.2 | 6.5  | 24.8 | 36.8 | 14.0 | 3.7  |
| 11.6 | 6.0  | 50.6 | 13.7 | 8.5  | 9.5  |
| 10.1 | 33.9 | 21.7 | 18.8 | 5.3  | 10.3 |
| 10.0 | 4.0  | 15.4 | 18.5 | 36.7 | 15.5 |
| 9.1  | 3.2  | 43.4 | 20.2 | 14.0 | 10.3 |
| 8.7  | 2.2  | 43.4 | 23.4 | 13.2 | 9.2  |

\* each row represents one participant's importance levels; rows are ordered (top to bottom) based on importance assigned to ability to reduce CRC incidence and mortality

## Appendix 5: Previous studies of CRC screening test attribute importance

| Study                             | Technique                                 | Most important attribute | Second most important attribute | Third most important attribute | Fourth most important attribute              |
|-----------------------------------|-------------------------------------------|--------------------------|---------------------------------|--------------------------------|----------------------------------------------|
| Marshall et al 2007 <sup>25</sup> | DCE                                       | Sensitivity              | Specificity                     | Preparation                    | Process                                      |
| Hawley et al 2008 <sup>13</sup>   | Conjoint analysis                         | Nature of the test (33%) | Accuracy (19%)                  | Frequency (17%)                | Discomfort (16%)                             |
| Debourcy et al 2008 <sup>26</sup> | Ranking (most important only)             | Accuracy (43%)           | Ease, convenience, time (30%)   | Comfort / invasiveness (16%)   | Frequency (7%)                               |
| Shokar et al 2010 <sup>27</sup>   | Rating and Ranking                        | Accuracy                 | Scientific evidence             | Amount of colon examined       | Need for sedation / Need for further testing |
| Imaede et al 2010 <sup>28</sup>   | Ranking using Maximum Differences Scaling | Sensitivity              | Risk of a tear                  | Need for a second test         | Need for sedation                            |

CRC=colorectal cancer

DCE= discrete choice experiment
